# Supplementary material for: Mobility of Lower MA-Helices for Ion Conduction through Lateral Portals in 5-HT3A Receptors
Source: PubMed Central journal article supplement — Biophys J. 2020 Nov 4;119(12):2593–603. doi: 10.1016/j.bpj.2020.10.029 (PMC7822733; doi:10.1016/j.bpj.2020.10.029), 2020-11-04
Supplement: mmc1.pdf [file mmc1.pdf]

**Biophysical Journal, Volume 119**

**Supplemental Information**

**Mobility of Lower MA-Helices for Ion Conduction through Lateral Portals in 5-HT<sub>3A</sub> Receptors**

**Antonia G. Stuebler and Michaela Jansen**

## Supplemental Information

### Mobility of lower MA-helices for ion-conduction through lateral portals in 5-HT<sub>3A</sub> receptors

Antonia G. Stuebler, Michaela Jansen

#### Supporting Information included:

- Figure S1
- Figure S2
- Figure S3

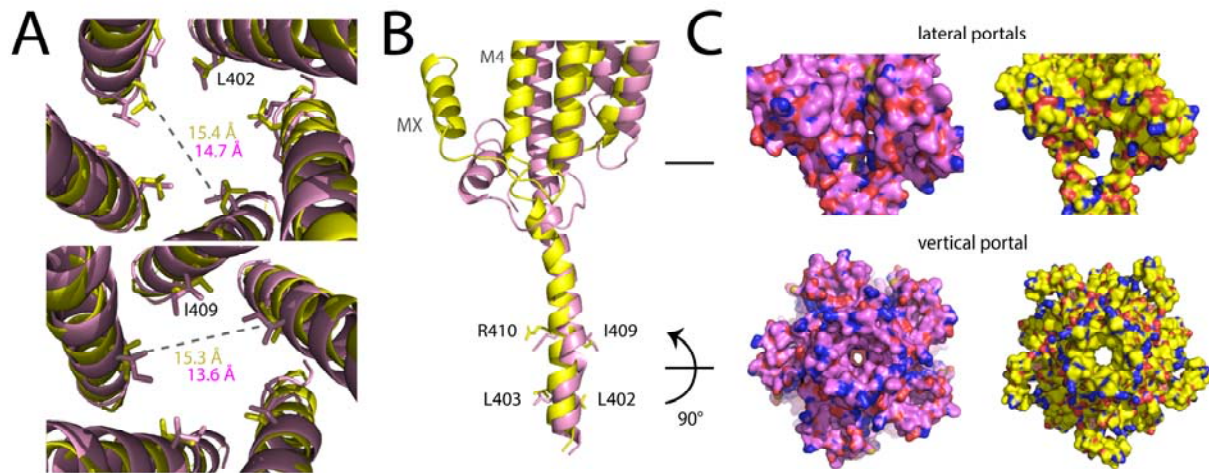

**Figure S1. Structural alignment of 5-HT<sub>3A</sub> Apo (PDB: 6BE1, pink) and State 2 (PDB: 6DG8, yellow) and detailed view of possible ion exit pathways. (A)** View down the pore of the ICD of 5-HT<sub>3A</sub>. Side chains visible for L402/L403 (top panel) and I409/R410 (bottom panel) as well as the pore diameter for the different structures. **(B)** Alignment of a single subunit of 5-HT<sub>3A</sub>, cartoon representation, emphasizing the differences between the open and closed conducting states. **(C)** Surface representation of 5-HT<sub>3A</sub> in different conformational states, showing a detailed view of the plausible ion exit pathways. (top panel) Detailed view of the lateral portals between two adjacent MA-helices around the R0' (R436), viewed parallel to the membrane. State 2, which is potentially conducting (PDB: 6DG8), shows a larger lateral opening as compared to the apo structure (PDB: 6BE1). (bottom panel). Receptors viewed from the intracellular side, comparing the diameter of the vertical pore in the different structures, again with state 2 having a slightly larger aperture as compare to the apo state.

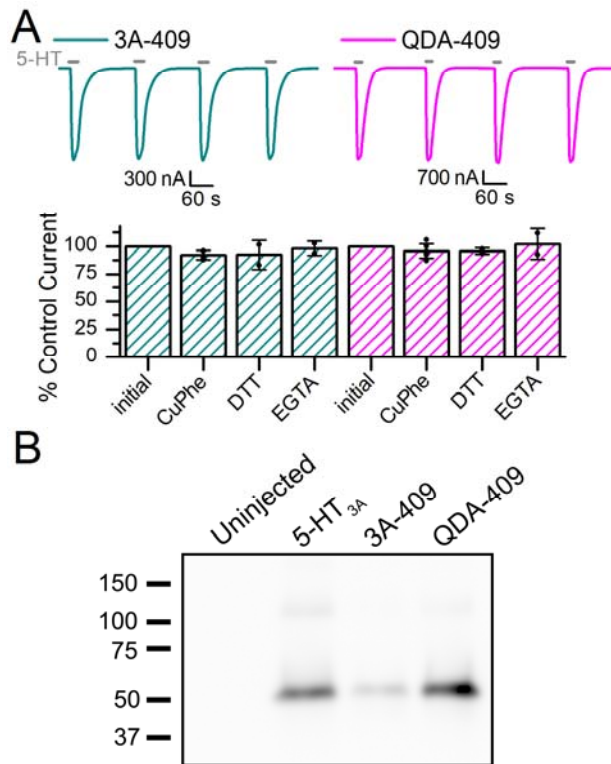

**Figure S2. Evaluation of single Cys at I409 in response to 5-HT, Cu:Phe, DTT, and EGTA.** (A) (top panel) Sample traces of 5-HT<sub>3A</sub>-I409C and QDA-I409C in response to 3  $\mu$ M 5-HT, showing stable current amplitudes with each agonist application. (bottom panel) Quantification of current amplitudes after 5-HT<sub>3A</sub>-I409C and QDA-I409C were exposed to Cu:Phe (100:200  $\mu$ M), 10 mM DTT, and 1mM EGTA. The first inward current recorded in response to 3  $\mu$ M 5-HT is the reference current amplitude (100% of current). Experimental set-up was the same as in Fig. 3A. Data is shown as mean $\pm$ S.D. Individual data points are shown as circles overlaid on top of the bar graph ( $n \geq 2$ ). Statistical significance was determined with one-way ANOVA, Dunnett's multiple comparisons test between the initial inward current and each set of conditions. (B) Western blot of single Cys and uninjected oocytes and 5-HT<sub>3A</sub> as controls. Experimental set-up was the same as in Fig. 2. Expressing *X. laevis* oocytes were exposed to 2 min of 100:200  $\mu$ M Cu:Phe. SDS-PAGE fractions were run without reducing agent.

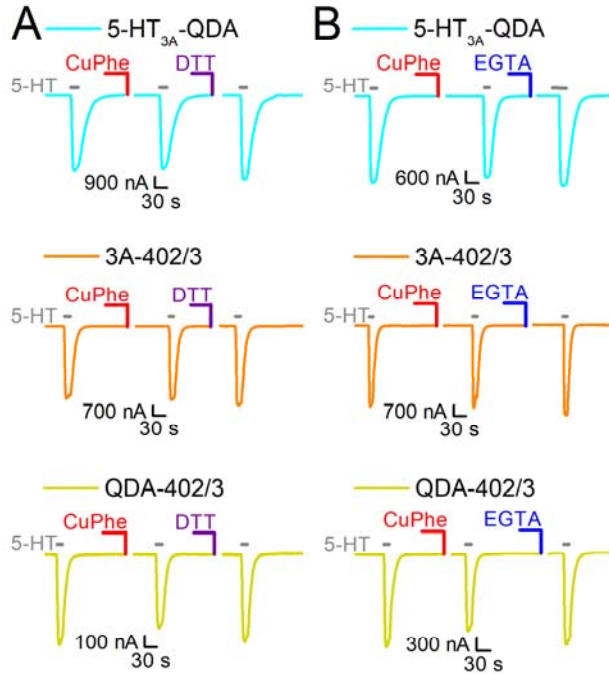

**Figure S3. No Effect of Cu:Phe, DTT, and EGTA on QDA and L402C/L403C Cys pairs. (A)** Sample traces of QDA (cyan), 5-HT<sub>3A</sub>-L402C/L403C (orange), and QDA-L402C/L403C (yellow). The inward currents were evoked with 3 μM 5-HT (grey bars). The initial inward current represents the reference current amplitude (100% of current). Following the 5-HT application(s), the oocytes were exposed to 2 min of Cu:Phe (100:200 μM) and then a 6 min wash with OR-2 (not pictured) before another application of 5-HT (second inward current depicted). 5-HT was applied until a stable current response was achieved (stable response to 5-HT is the inward current before DTT, labeled "5-HT" in Fig. 4 for I409C/R410C mutants). Lastly, 10 mM DTT was applied to the oocytes for 2 min, followed by a 6 min OR-2 wash (not pictured) and 5-HT (last inward current pictured). **(B)** Sample traces of QDA (cyan), 5-HT<sub>3A</sub>-L402C/L403C (orange), and QDA-L402C/L403C (yellow). Same experimental set-up as in (A) but during the last step 1 mM EGTA was applied instead of DTT.
